# Supplementary material for: Association and prognostic significance of BRCA1/2-mutation status with neoantigen load, number of tumor-infiltrating lymphocytes and expression of PD-1/PD-L1 in high grade serous ovarian cancer
Source: PubMed Central journal article supplement (PMC4924663; doi:10.18632/oncotarget.7277), 2016-02-09
Supplement: oncotarget-07-13587-s001.pdf [file oncotarget-07-13587-s001.pdf]

## Association and prognostic significance of BRCA1/2-mutation status with neoantigen load, number of tumor-infiltrating lymphocytes and expression of PD-1/PD-L1 in high grade serous ovarian cancer

### Supplementary Materials

**Supplementary Table S1: Multivariate analyses including BRCA1/2-mutation status and neoantigen load in the TCGA dataset**

| Factor                                             | HR                            | Cox <i>p</i> |
|----------------------------------------------------|-------------------------------|--------------|
| BRCA1/2-mutated vs rest                            | 0.479, 95% C.I. = 0.308–0.745 | 0.001        |
| Neoantigen load (low quartile vs rest, cut-off 27) |                               | 0.232 (NS)   |

| Factor                                             | HR                            | Cox <i>p</i> |
|----------------------------------------------------|-------------------------------|--------------|
| BRCA1/2-mutated vs rest                            | 0.478, 95% C.I. = 0.308–0.741 | 0.001        |
| Neoantigen load (low quintile vs rest, cut-off 25) |                               | 0.13 (NS)    |

**Supplementary Table S2: Antibodies used in the study**

| Antibody | Company        | Clone              | Dilution | Antigen Retrieval Buffer |
|----------|----------------|--------------------|----------|--------------------------|
| CD3      | Dako           | A0452 (polyclonal) | 1:250    | H2                       |
| CD4      | Dako           | M7310 (4B12)       | 1:80     | H2                       |
| CD8      | Dako           | M7103 (C8/144B)    | 1:100    | H2                       |
| CD20     | Dako           | M0755 (L26)        | 1:500    | H1                       |
| PD-1     | Cell Marque    | 315 m-95 (NAT105)  | 1:300    | H2                       |
| PD-L1    | Cell Signaling | 13684 (E1L3N)      | 1:200    | H2                       |

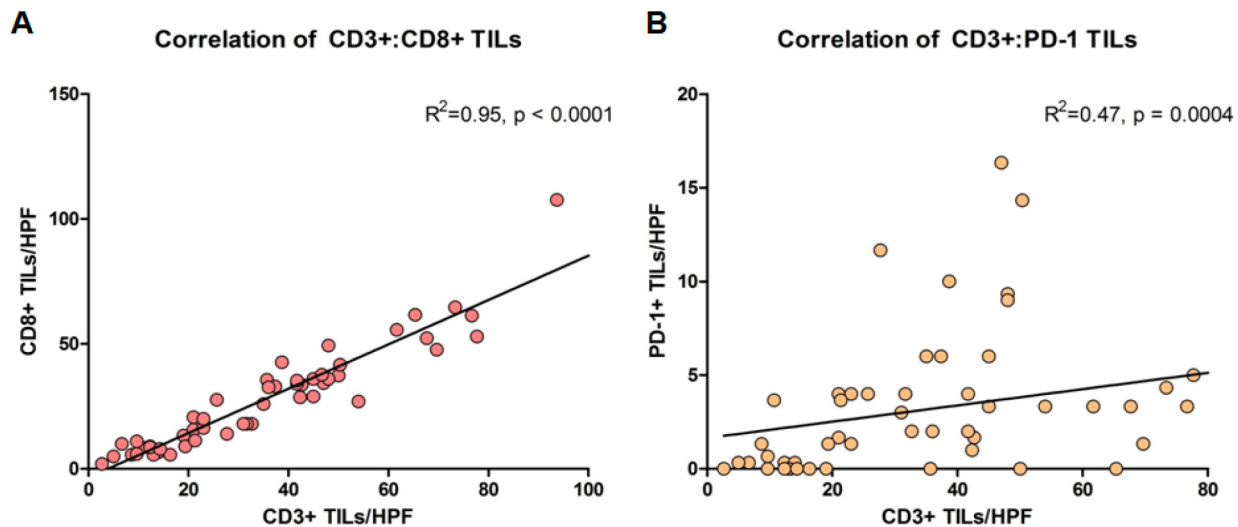

Supplementary Figure S1: Spearman correlation of CD3 and CD8 (A) and CD3 and PD-1 (B).

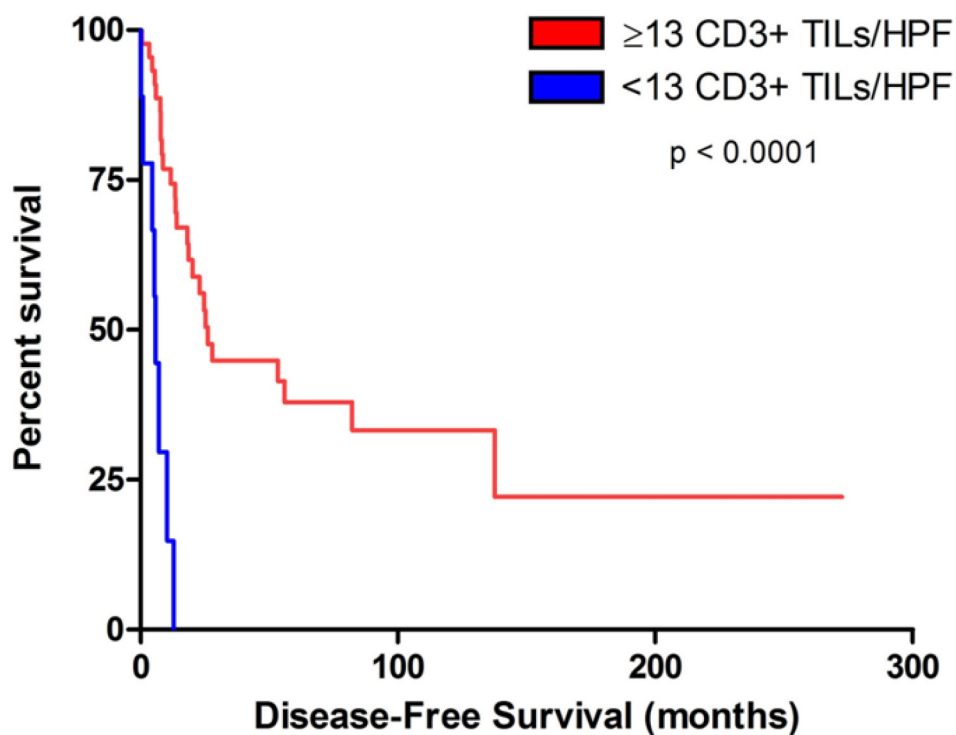

Supplementary Figure S2: Disease free survival for tumors with  $\geq 13$  CD3+ TILs/HPF versus tumors with  $< 13$  CD3+ TILs per HPF.
